# Supplementary material for: Identification of Novel Circulating miRNAs in Patients with Acute Ischemic Stroke
Source: MDPI journal article supplement (doi:10.3390/ijms23063387), 2022-03-21
Supplement: s1 [file s1]

**Supplementary Table S2. Circulating miRNA in stroke baseline patients (Males) versus healthy controls (Males).**

| miRNA           | Discovery           |                          | Validation          |                          | Combined            |                          |
|-----------------|---------------------|--------------------------|---------------------|--------------------------|---------------------|--------------------------|
|                 | Log2FC <sup>1</sup> | FDR <sup>2</sup>         | Log2FC <sup>1</sup> | FDR <sup>2</sup>         | Log2FC <sup>1</sup> | FDR <sup>2</sup>         |
| hsa-miR-451a    | 2.3                 | 2.73 × 10 <sup>-31</sup> | 2.3                 | 1.17 × 10 <sup>-28</sup> | 2.2                 | 2.59 × 10 <sup>-64</sup> |
| hsa-miR-574-5p  | -2.2                | 1.97 × 10 <sup>-15</sup> | -2.2                | 4.85 × 10 <sup>-21</sup> | -2.1                | 5.12 × 10 <sup>-43</sup> |
| hsa-miR-142-3p  | -2.4                | 1.04 × 10 <sup>-38</sup> | -2.1                | 1.68 × 10 <sup>-31</sup> | -2.3                | 1.03 × 10 <sup>-83</sup> |
| hsa-miR-6721-5p | -2.6                | 6.21 × 10 <sup>-10</sup> | -2.1                | 4.23 × 10 <sup>-08</sup> | -2.4                | 4.51 × 10 <sup>-24</sup> |
| hsa-miR-4446-3p | -2.1                | 4.92 × 10 <sup>-10</sup> | -2.1                | 2.79 × 10 <sup>-09</sup> | -1.9                | 2.58 × 10 <sup>-19</sup> |
| hsa-miR-485-3p  | -2.8                | 7.09 × 10 <sup>-13</sup> | -2.6                | 3.90 × 10 <sup>-14</sup> | -2.4                | 1.07 × 10 <sup>-24</sup> |
| hsa-miR-676-3p  | -2.4                | 1.75 × 10 <sup>-05</sup> | -2.5                | 2.08 × 10 <sup>-06</sup> | -2.5                | 9.25 × 10 <sup>-16</sup> |
| hsa-miR-379-5p  | -2.8                | 1.45 × 10 <sup>-19</sup> | -2.3                | 2.34 × 10 <sup>-19</sup> | -2.4                | 3.62 × 10 <sup>-39</sup> |
| hsa-miR-149-5p  | -3.6                | 8.49 × 10 <sup>-03</sup> | -3.1                | 1.23 × 10 <sup>-02</sup> | -3.4                | 2.85 × 10 <sup>-10</sup> |
| hsa-miR-411-5p  | -2.9                | 9.13 × 10 <sup>-13</sup> | -3.0                | 1.76 × 10 <sup>-13</sup> | -2.8                | 3.67 × 10 <sup>-31</sup> |

<sup>1</sup>Log2 Fold Change; <sup>2</sup>False Discovery Rate
