# Supplementary material for: Identification of Novel Circulating miRNAs in Patients with Acute Ischemic Stroke
Source: MDPI journal article supplement (doi:10.3390/ijms23063387), 2022-03-21
Supplement: s1 [file s1]

**Supplementary Table S5. 90-day clinical follow up data (modified Rankin Scale – mRS) of stroke baseline patients.**

| mRS score | Outcome | Discovery |      | Validation |      |
|-----------|---------|-----------|------|------------|------|
|           |         | n         | (%)  | n          | (%)  |
| 0         | Good    | 54        | 56.8 | 64         | 66.7 |
| 1         |         | 13        | 13.7 | 13         | 13.5 |
| 2         |         | 10        | 10.5 | 7          | 7.3  |
| 3         | Poor    | 15        | 15.8 | 11         | 11.5 |
| 4         |         | 2         | 2.1  | 1          | 1.0  |
| 5         |         | 1         | 1.1  | 0          | 0.0  |
| 6         |         | 0         | 0.0  | 0          | 0.0  |
